# Supplementary material
Source: ML conference proceedings conference paper supplement (https://openaccess.thecvf.com/content/cvpr_2016/html/Liu_Multilinear_Hyperplane_Hashing_2016_CVPR_paper.html)
Supplement: Supplementary file 1 [file Liu_Multilinear_Hyperplane_Hashing_2016_CVPR_supplemental.pdf]

# Multilinear Hyperplane Hashing

Xianglong Liu<sup>†</sup> Xinjie Fan<sup>†</sup> Cheng Deng<sup>‡</sup> Zhujin Li<sup>†</sup> Hao Su<sup>§</sup> Dacheng Tao<sup>‡</sup>

<sup>†</sup>State Key Lab of Software Development Environment, Beihang University, Beijing, China

<sup>‡</sup>School of Electronic Engineering, Xidian University, Xi'an, China

<sup>§</sup>Department of Computer Science, Stanford University, Stanford, CA, USA

<sup>‡</sup>QCIS and FEIT, University of Technology, Sydney, Australia

xlliu@nlsde.buaa.edu.cn chdeng.xd@gmail.com dacheng.tao@uts.edu.au

## 1. The Proof

**Theorem 1** Given a database  $\mathcal{D}$  with  $n$  points and a hyperplane query  $\mathcal{P}_w$ , if there exists a database point  $\mathbf{x}^*$  such that  $d(\mathbf{x}^*, \mathcal{P}_w) \leq r$ , then with  $\rho = \frac{\ln p_1}{\ln p_2}$  (1) using  $n^\rho$  hash tables with  $\log_{1/p_2} n$  hash bits, the random multilinear hyperplane hash of an even order is able to return a database point  $\hat{\mathbf{x}}$  such that  $d(\hat{\mathbf{x}}, \mathcal{P}_w) \leq r(1 + \epsilon)$  with probability at least  $1 - \frac{1}{c} - \frac{1}{e}$ ,  $c \geq 2$ ; (2) the query time is sublinear to the entire data number  $n$ , with  $n^\rho \log_{1/p_2} n$  bit generations and  $cn^\rho$  pairwise distances computation.

This can be completed easily following prior research [1, 2].

**Proof 1** Denote the number of hash tables to be  $L$ . For the  $l$ -th hash table, the proposed MH-Hash algorithm randomly samples  $k$  hash functions  $h_{l,1}^m, \dots, h_{l,k}^m$  with replacement from  $\mathbf{M}_m$ , which will generate a  $k$ -bit hash key for each input data vector  $\mathbf{x}$ . We denote  $\mathbf{x}$ 's hash code by  $\mathbf{H}_l^m(\mathbf{x}) = [h_{l,1}^m(\mathbf{x}), \dots, h_{l,k}^m(\mathbf{x})]$ . The main observation is that using  $L = n^\rho$  independent hash tables, a  $(1 + \epsilon)$ -appropriate nearest neighbor is achieved with a nontrivial constant probability. Moreover, the query (search) time complexity is proved to be sub-linear with respect to the entire data number  $n$ .

To complete the proof, we define the following two events  $\mathbf{F}_1$  and  $\mathbf{F}_2$ . It suffices to prove the theorem by showing that both  $\mathbf{F}_1$  and  $\mathbf{F}_2$  hold with probability larger than 0.5. The two event are defined as follows:

$\mathbf{F}_1$ : If there exists a database point  $\mathbf{x}^*$  such that  $d(\mathbf{x}^*, \mathcal{P}_w) \leq r$ , then  $\mathbf{H}_l^m(\mathbf{x}^*) = \mathbf{H}_l^m(\mathcal{P}_w)$  for some  $1 \leq l \leq L$ .

$\mathbf{F}_2$ : Provided with a false alarm set

$$\mathcal{S} = \{\tilde{\mathbf{x}} \mid \tilde{\mathbf{x}} \in \mathcal{X} \text{ such that } D(\tilde{\mathbf{x}}, \mathcal{P}_w) > r(1 + \epsilon) \text{ and } \exists l \in [1 : L], \mathbf{H}_l^m(\tilde{\mathbf{x}}) = \mathbf{H}_l^m(\mathcal{P}_w)\},$$

where  $\epsilon > 0$  is the given small constant. Then the set cardinality  $|\mathcal{S}| < cL$ .

First, we prove that  $\mathbf{F}_1$  holds with probability at least  $1 - \frac{1}{e}$ .

Let us consider the converse case that  $\mathbf{H}_l^m(\mathbf{x}^*) \neq \mathbf{H}_l^m(\mathcal{P}_w)$  for  $\forall l \in [1 : L]$  whose probability is

$$\begin{aligned} & \mathbf{P}[\mathbf{H}_l^m(\mathbf{x}^*) \neq \mathbf{H}_l^m(\mathcal{P}_w), \forall l \in [1 : L]] \\ &= (\mathbf{P}[\mathbf{H}_l^m(\mathbf{x}^*) \neq \mathbf{H}_l^m(\mathcal{P}_w)])^L \\ &= (1 - \mathbf{P}[\mathbf{H}_l^m(\mathbf{x}^*) = \mathbf{H}_l^m(\mathcal{P}_w)])^L \\ &\leq (1 - p_1^k)^L = (1 - p_1^{\log_{1/p_2} n})^{n^\rho} = (1 - n^{-\rho})^{n^\rho} \\ &= ((1 - n^{-\rho})^{-n^\rho})^{-1} \leq \frac{1}{e}, \end{aligned}$$

where inequality (1) follows the inequality  $(1 - n^{-\rho})^{-n^\rho} \geq e$ . Herewith we derive

$$\begin{aligned} & \mathbf{P}[\mathbf{H}_l^m(\mathbf{x}^*) = \mathbf{H}_l^m(\mathcal{P}_w), \exists l \in [1 : L]] \\ &= 1 - \mathbf{P}[\mathbf{H}_l^m(\mathbf{x}^*) \neq \mathbf{H}_l^m(\mathcal{P}_w), \forall l \in [1 : L]] \\ &\geq 1 - \frac{1}{e}. \end{aligned}$$

Second, we prove that  $\mathbf{F}_2$  holds with probability at least  $1 - \frac{1}{e}$ .

For every false alarm point  $\tilde{\mathbf{x}}$  conforming to  $D(\tilde{\mathbf{x}}, \mathcal{P}_w) > r(1 + \epsilon)$ , in any hash table  $l \in [1 : L]$  we have

$$\mathbf{P}[\mathbf{H}_l^m(\tilde{\mathbf{x}}) = \mathbf{H}_l^m(\mathcal{P}_w)] < p_2^k = (p_2)^{\log_{1/p_2} n} = \frac{1}{n}.$$

Therefore the expected number of false alarm points, which fall into the same hash bucket with the query  $\mathcal{P}_w$  in hash table  $l$ , is smaller than  $n \times 1/n = 1$ . Immediately, we

conclude  $\mathbf{E}[\|\mathcal{S}\|] < L$ . Subsequently, we further apply Markov's inequality to derive the following result:

$$\mathbf{P}[\|\mathcal{S}\| \geq cL] \leq \frac{\mathbf{E}[\|\mathcal{S}\|]}{cL} < \frac{L}{cL} = \frac{1}{c},$$

which leads to

$$\mathbf{P}[\|\mathcal{S}\| < cL] = 1 - \mathbf{P}[\|\mathcal{S}\| \geq cL] > 1 - \frac{1}{c}.$$

Third, we prove that  $F_1$  and  $F_2$  **simultaneously hold with probability at least**  $1 - \frac{1}{c} - \frac{1}{e}$ .

## References

- [1] P. Jain, S. Vijayanarasimhan, and K. Grauman. Hashing Hyperplane Queries to Near Points with Applications to Large-Scale Active Learning. In *NIPS*, pages 928–936. 2010. [1](#)
- [2] W. Liu, J. Wang, Y. Mu, S. Kumar, and S.-F. Chang. Compact hyperplane hashing with bilinear functions. In *ICML*, pages 1–8, 2012. [1](#)
